# Supplementary material
Source: PubMed Central journal article supplement (PMC6805106)
Supplement: JB.00524-19-s0001.pdf [file JB.00524-19-s0001.pdf]

## SUPPLEMENTAL FIGURE LEGENDS-

**Fig S1. CbsR12 is processed by RNase III.** (A). CbsR12 secondary structure as predicted by mFold. Nucleotide 1 was determined to be the TSS for the full-size transcript by 5' RACE. Red asterisks indicate apparent alternative TSSs by 5' RACE. Dotted line indicates the putative RNase III processing area. Blue solid lines indicate consensus CsrA-binding sites. (B). RNase III assay of *in vitro*-transcribed CbsR12 with the *C. burnetii* IVS RNA as a positive control. Results from treatment with *E. coli* (*Ec*) RNase III (New England BioLabs), recombinant *C. burnetii* (*Cb*) RNase III or no-enzyme controls are shown and done as previously described (1). Arrows indicate RNase III-processed (blue) and un-processed (red) CbsR12 RNA.

**Fig S2. Location of the MB-*cbsR12* transposon insertion to inactivate *cbsR12*.** (A). The *cbsR12* gene and promoter elements are highlighted by the indicated colors, while the location of the *Himar* transposon insertion producing the MB-*cbsR12* strain is marked by a black arrow. Red arrows denote primer-binding sites for PCR confirmation of the lesion (forward and reverse primers above and below their annealing sequences, respectively). (B). PCR products confirming transposon insertion in *cbsR12* of MB-*cbsR12* (red arrow) by loss of the ~250 bp amplicon and reintroduction of *cbsR12* in MB-*cbsR12*-Comp (blue arrow). (C). Copy number qPCR analysis confirming a single additional insertion of *cbsR12* in the MB-*cbsR12*-Comp strain. Values represent the means  $\pm$  standard error of means (SEM) of three independent determinations.

**Fig S3. Additional biological replicates for ACCM-2 and THP-1 growth curves.** Growth curves for MB-WT, MB-*cbsR12*, and MB-*cbsR12*-Comp strains in ACCM-2 (A, B) or THP-1 cells (C, D) as determined by qPCR. The 0dpi time point refers to the inoculum. Values represent means  $\pm$  standard error of means (SEM) of three technical replicates.

**Fig S4. CbsR12 competitively binds *carA*, *metK*, and *cvpD* transcripts in a dose-dependent manner.** RNA-RNA EMSAs showing hybridization reactions between biotin-labeled CbsR12 (Bio-CbsR12) and an *in vitro*-transcribed segment of *carA* (A), *metK* (B), or *cvpD* (C). Anti-CbsR12 represents a positive control consisting of a transcript equal in size but antisense to the CbsR12 transcript. A cold-chase sample containing Bio-CbsR12 + un-labeled CbsR12 + CarA/MetK/CvpD shows competitive (specific) binding relative to Bio-CbsR12 plus target alone, while increasing the dose of *carA/metK/cvpD* transcript (from 2 nM to 10 nM) increases the amount of retarded sample signal on the blot. Arrows indicate un-bound Bio-CbsR12 (blue) and Bio-CbsR12 bound to its RNA targets (red).

**Fig S5. Artemis views of CbsR12 binding to *carA*, *metK*, *ahcY*, and *cvpD* transcripts.** Artemis representation of Crosslink-Seq results for MB-WT. Red and blue lines represent the two biological replicates. (A). CbsR12 crosslinking with *carA* reads (blue arrow). (B). CbsR12 crosslinking with *metK* reads (blue arrow) and *ahcY* reads (red arrow). (C). CbsR12 crosslinking with *cvpD* reads (blue arrow).

**Fig S6. CbsR12 downregulates the quantity of transcripts arising from the 5' end of *cvpD* in LCVs from infected THP-1 cells.** (A). *cvpD* gene sequence from the 5' TSS to the predicted downstream alternative start codon. Indicated colors highlight the TSSs, the CbsR12-binding site, the putative downstream promoter, putative RBSs, and start codons. Red arrows show primer annealing regions for qRT-PCR (forward and reverse primers above and below their

respective annealing sequences). **(B)**. Representation of CbsR12 binding to the *cvpD* transcript as determined by IntaRNA with base numbers indicated. The top strand in the model represents the *metK* sequence, while the bottom strand represents the complementary CbsR12 sequence. **(C)**. qRT-PCR of the 5' end of *cvpD* from MB-WT, MB-*cbsR12*, and MB-*cbsR12*-Comp LCVs (3dpi) and SCVs (7dpi) infecting THP-1 cells. Values represent means  $\pm$  standard error of means (SEM) of three independent determinations (\*\* =  $P < 0.01$ , one-way ANOVA, \*\*\* =  $P < 0.001$ , one-way ANOVA).

**Fig S7. Coomassie blue-stained SDS-PAGE gels corresponding to Fig. 9 to demonstrate loading consistency.** **(A)**. Proteins (30  $\mu$ g total) from MB-WT, MB-*cbsR12*, and MB-*cbsR12*-Comp LCVs (mid-log phase; 96h for MB-WT and MB-*cbsR12*-Comp and 144h for MB-*cbsR12*) grown in ACCM-2 were resolved on a 10-20% acrylamide gradient SDS-PAGE gel and stained with Coomassie brilliant blue R. **(B)**. Proteins (60  $\mu$ g total) from MB-WT, MB-*cbsR12*, and MB-*cbsR12*-Comp LCVs (mid-log phase; 96h for MB-WT and MB-*cbsR12*-Comp and 144h for MB-*cbsR12*) grown in ACCM-2 were resolved on a 10-20% acrylamide gradient SDS-PAGE gel and stained with Coomassie brilliant blue R.

**Fig S8. CbsR12 in *E. coli* leads to an autoaggregative phenotype and biofilm formation.** **(A)**. Overnight cultures of *E. coli* Top10 F' harboring pBEST + *carA5'*UTR or pBEST + *carA5'*UTR + *cbsR12* were inoculated into 3 mL LB supplemented with ampicillin (100  $\mu$ g/mL), grown for 2 h at 37°C with shaking, then induced with 1 mM IPTG for 3 h before photography. The red arrow indicates autoaggregation of *E. coli* in the presence of CbsR12. **(B)**. *in vitro* biofilm formation assay of *E. coli* Top10 F' harboring pBEST or pBEST + *carA5'*UTR + *cbsR12*. Crystal violet staining is indicative of adherence due to biofilm induction. Values represent the average OD<sub>570</sub> readings of 10 wells  $\pm$  standard error of means (SEM) of three independent determinations (\* =  $P < 0.05$ , student's *t* test, \*\* =  $P < 0.01$ , student's *t* test).

**Fig S9. CbsR1 is an additional *C. burnetii* sRNA with RsmY/Z-like characteristics.** **(A)**. The *cbsR1* gene, predicted promoter elements, and putative LetA-binding site are highlighted by the indicated colors. **(B)**. CbsR1 secondary structure as predicted by mFold. Nucleotide 1 was predicted to be the TSS for the full-size transcript by analysis of RNA-Seq datasets. Blue solid lines indicate putative CsrA-binding sites.

**Fig S10. Strains, plasmids, and primers used in the study.**

#### SUPPLEMENTAL LITERATURE CITED-

- Warrier I, Walter MC, Frangoulidis D, Raghavan R, Hicks LD, Minnick MF. 2016. The Intervening Sequence of *Coxiella burnetii*: Characterization and Evolution. *Front Cell Infect Microbiol* **6**: 83.
- Martinez E, Cantet F, Fava L, Norville I, Bonazzi M. 2014. Identification of OmpA, a *Coxiella burnetii* Protein Involved in Host Cell Invasion, by Multi-phenotypic High-content Screening. *PLoS Pathog* **10**:e1004013.

3. Choi KH, Gaynor JB, White KG, Lopez C, Bosio CM, Karkhoff-Schweizer RR, Schweizer HP. 2005. A Tn7-based broad-range bacterial cloning and expression system. *Nat Methods* **2**:443-448.

Fig. S1

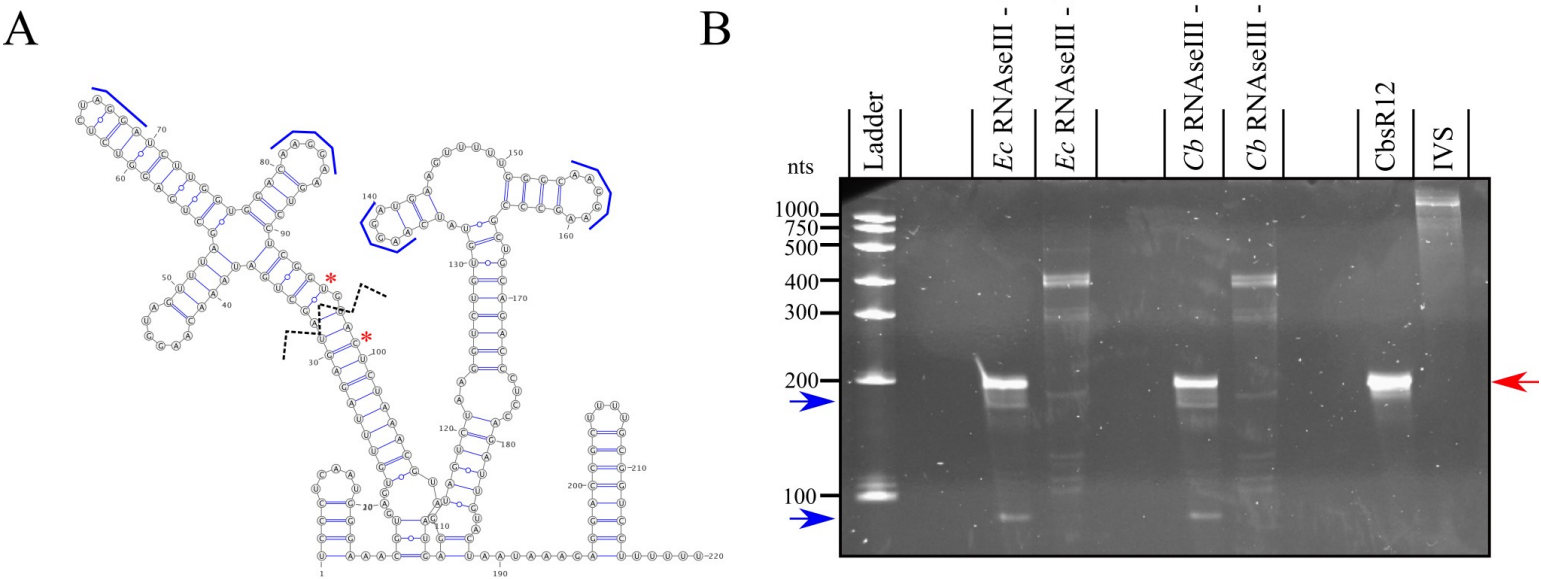

Fig. S2

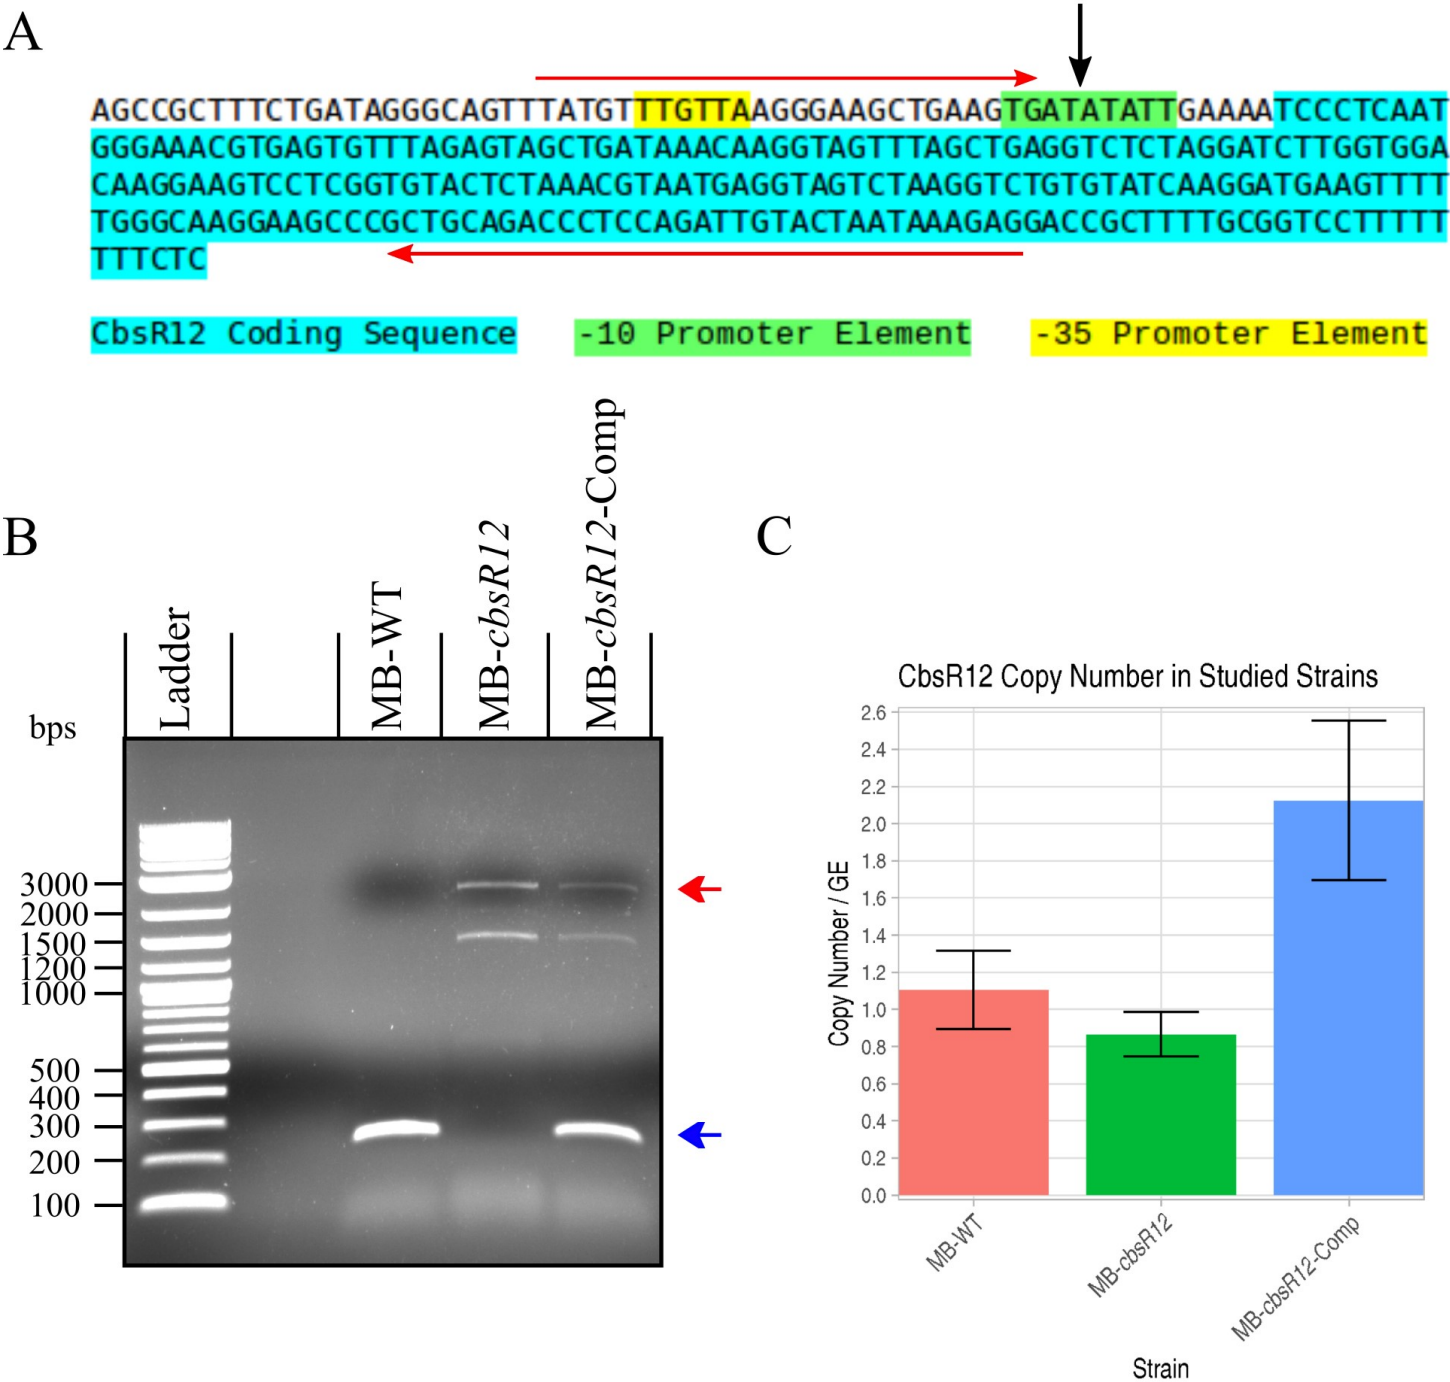

Fig. S3

A

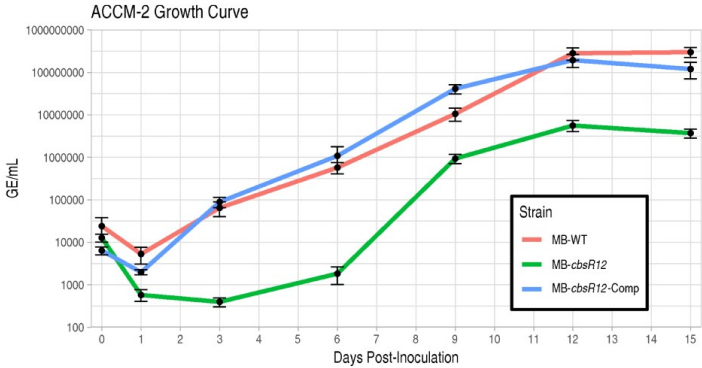

B

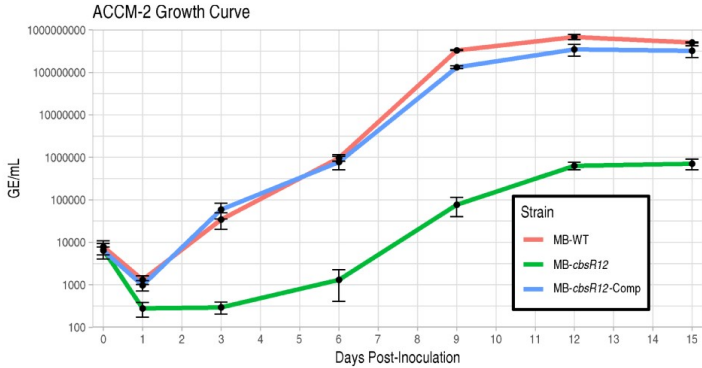

C

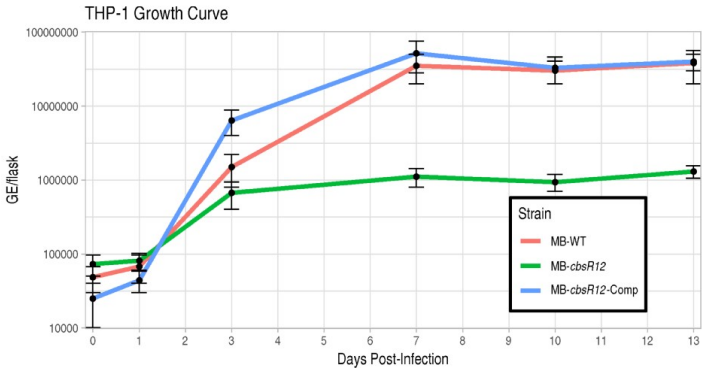

D

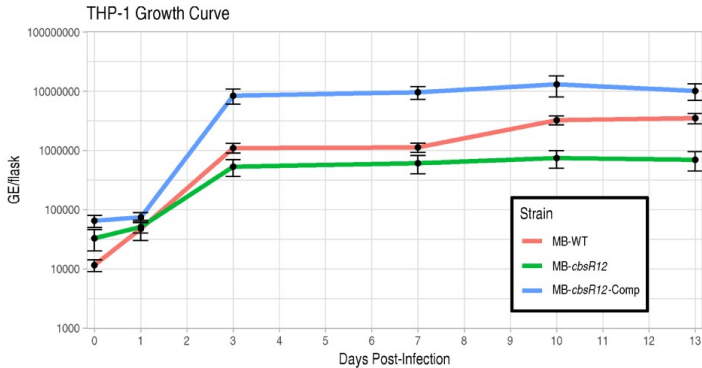

Fig. S4

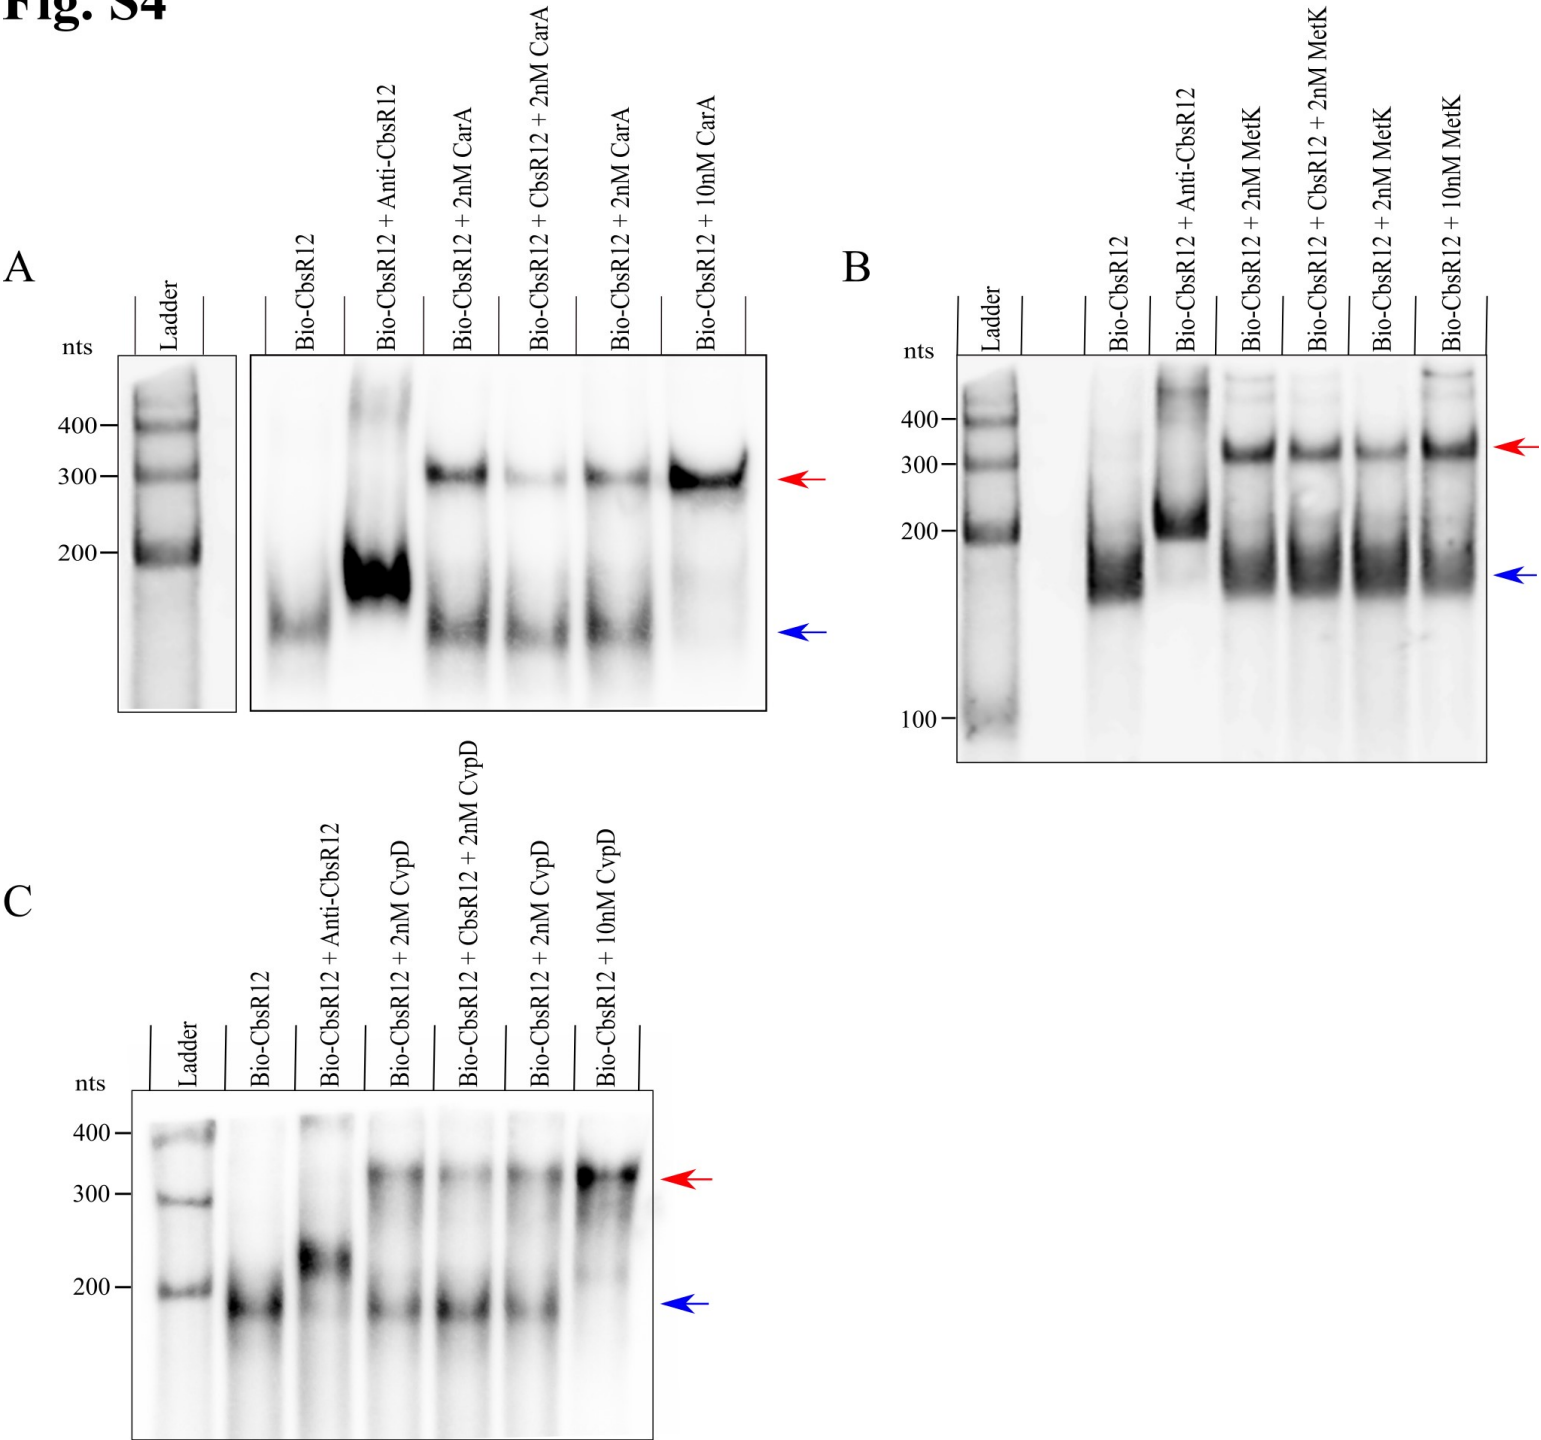

Fig. S5

A

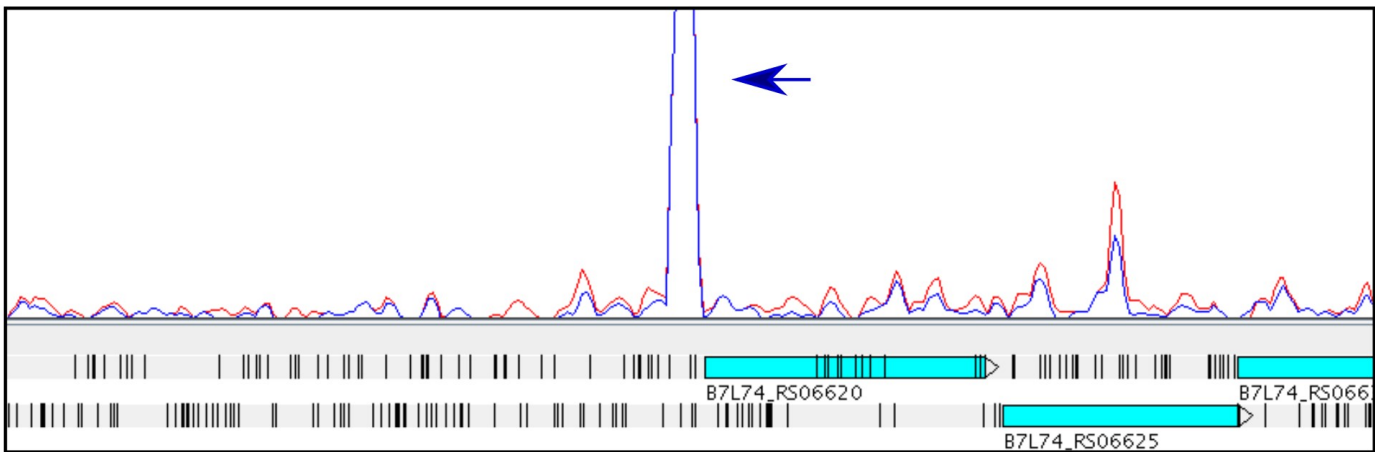

B

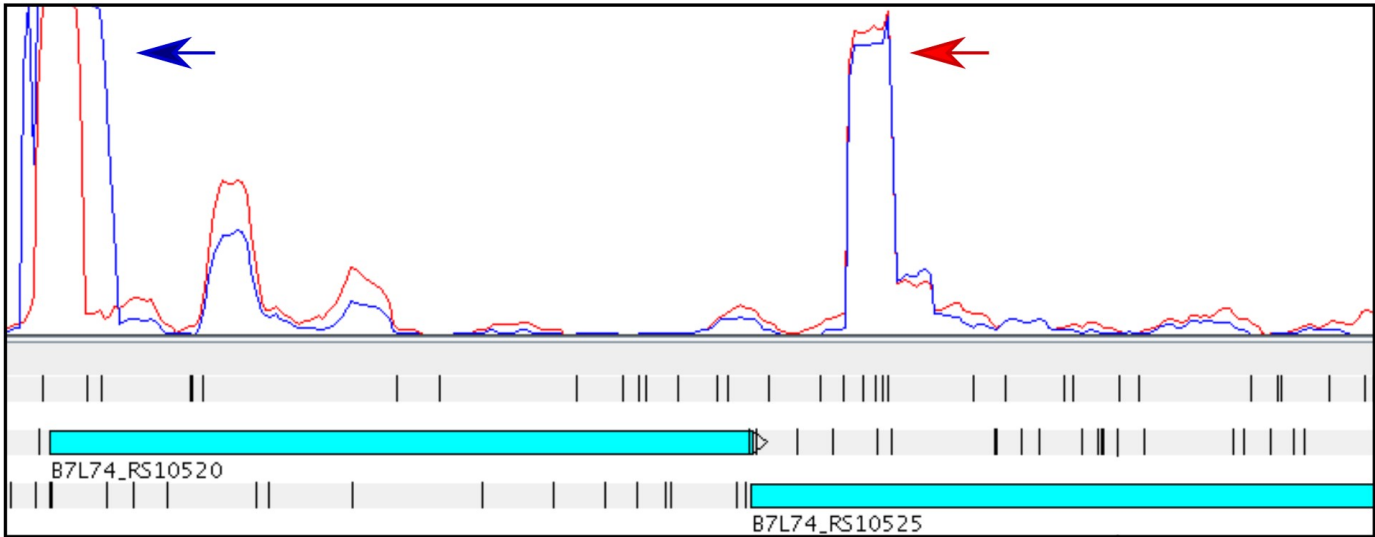

C

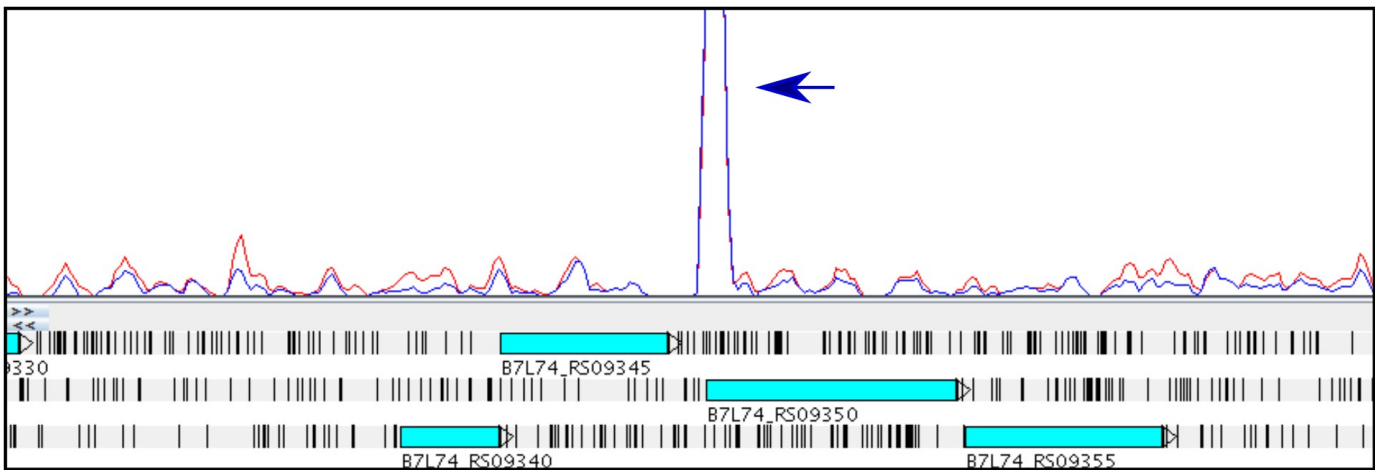

Fig. S6

A

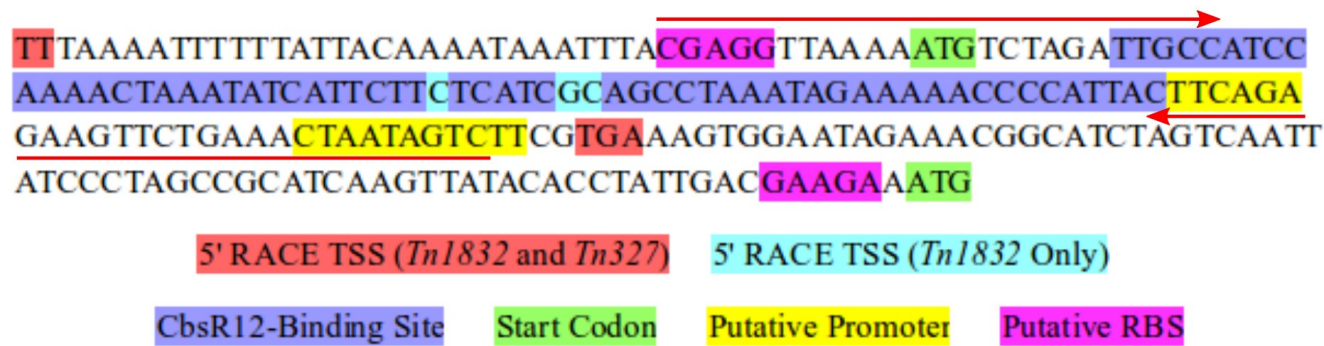

B

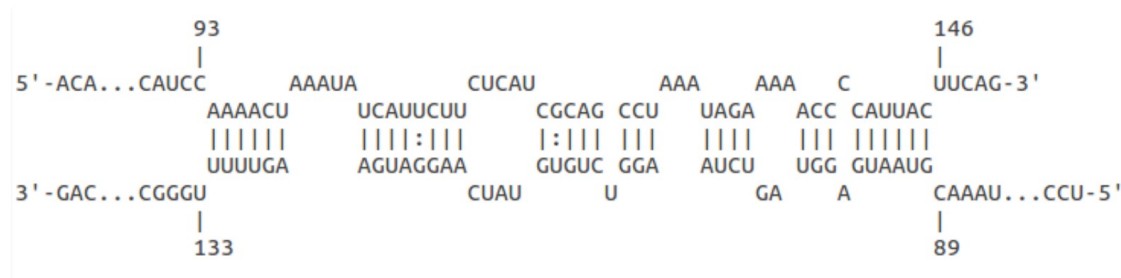

C

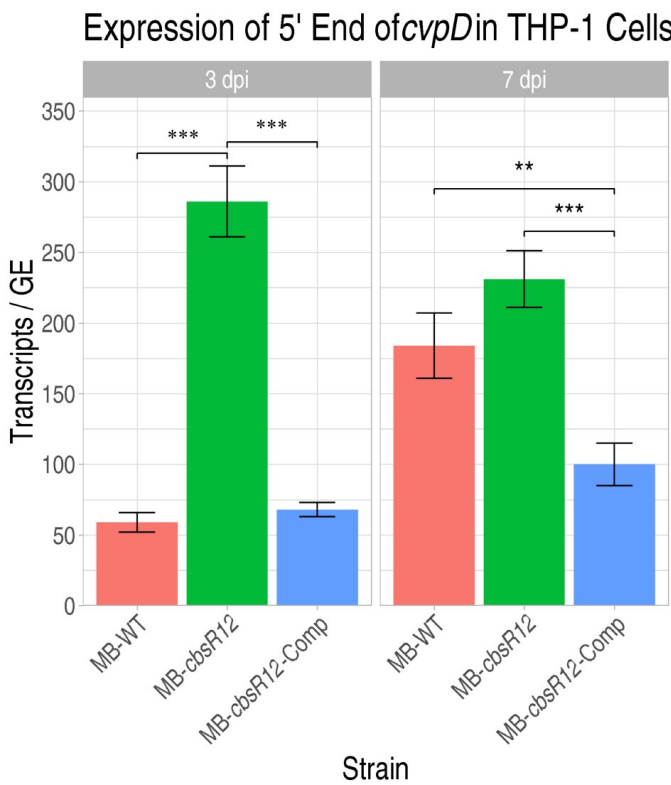

**Fig. S7**

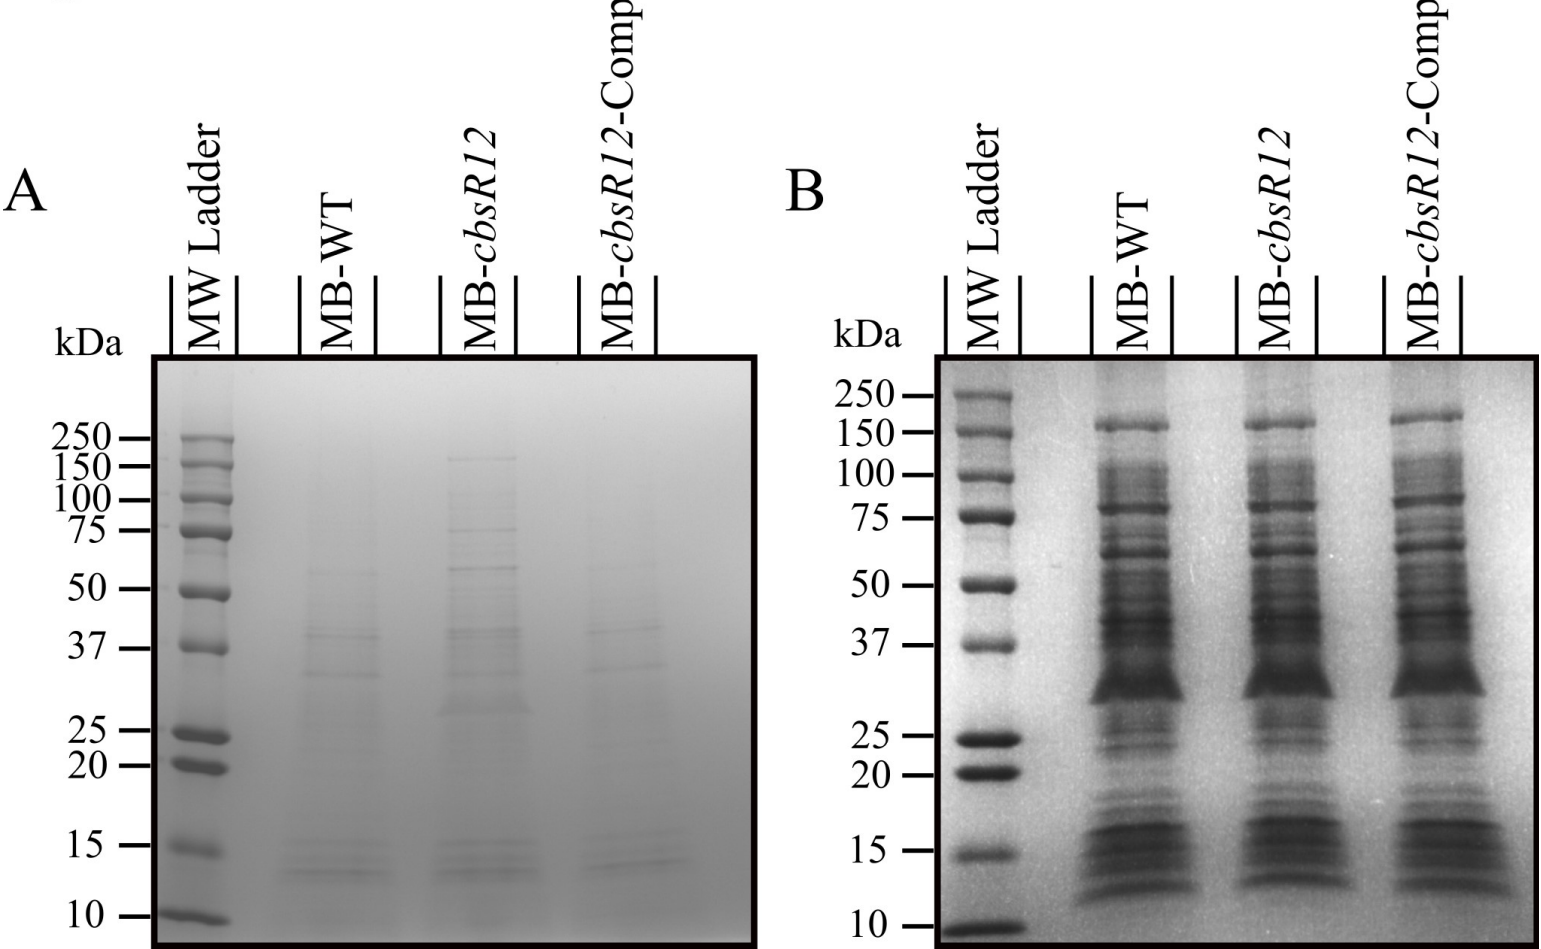

Fig. S8

A

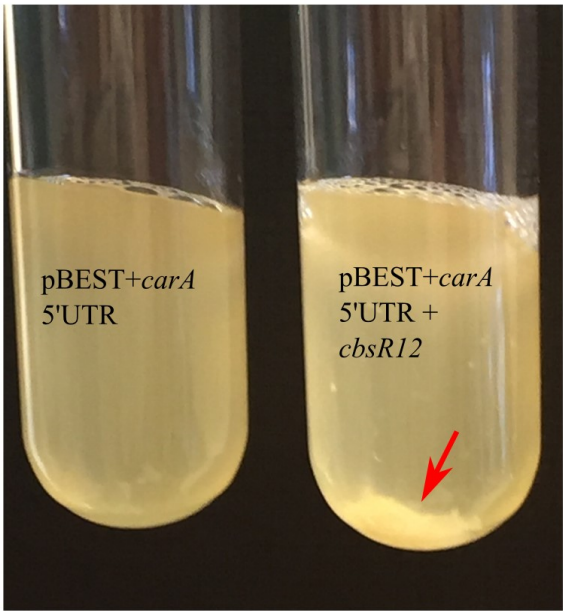

B

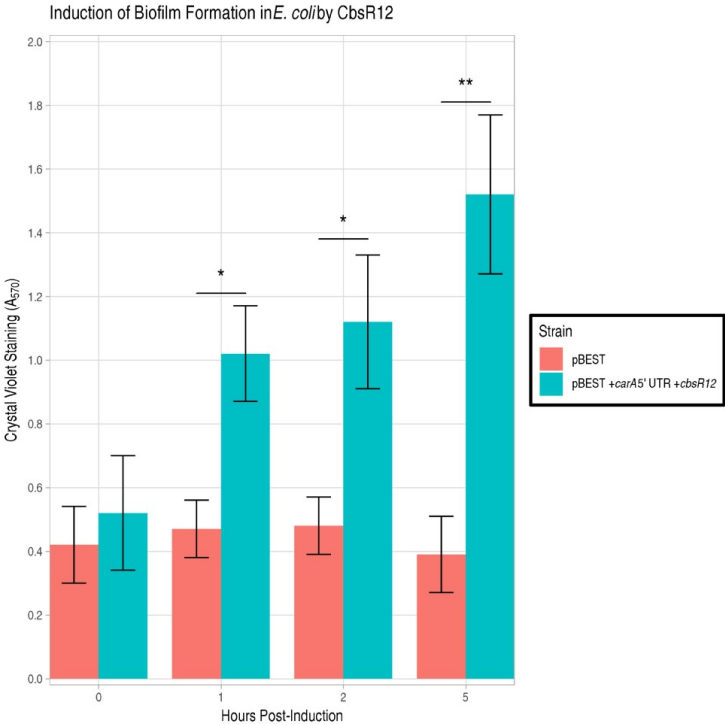

Fig. S9

A

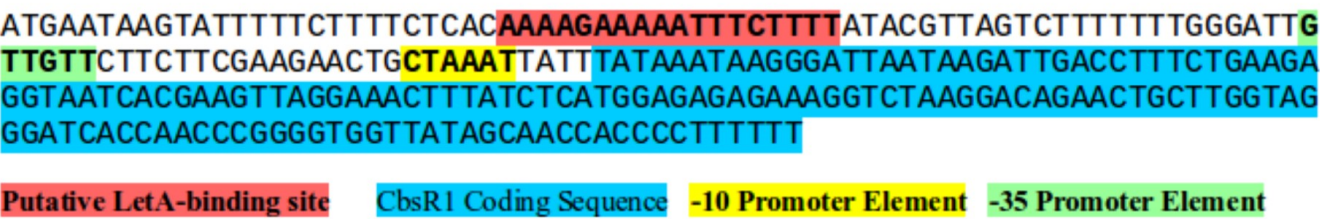

B

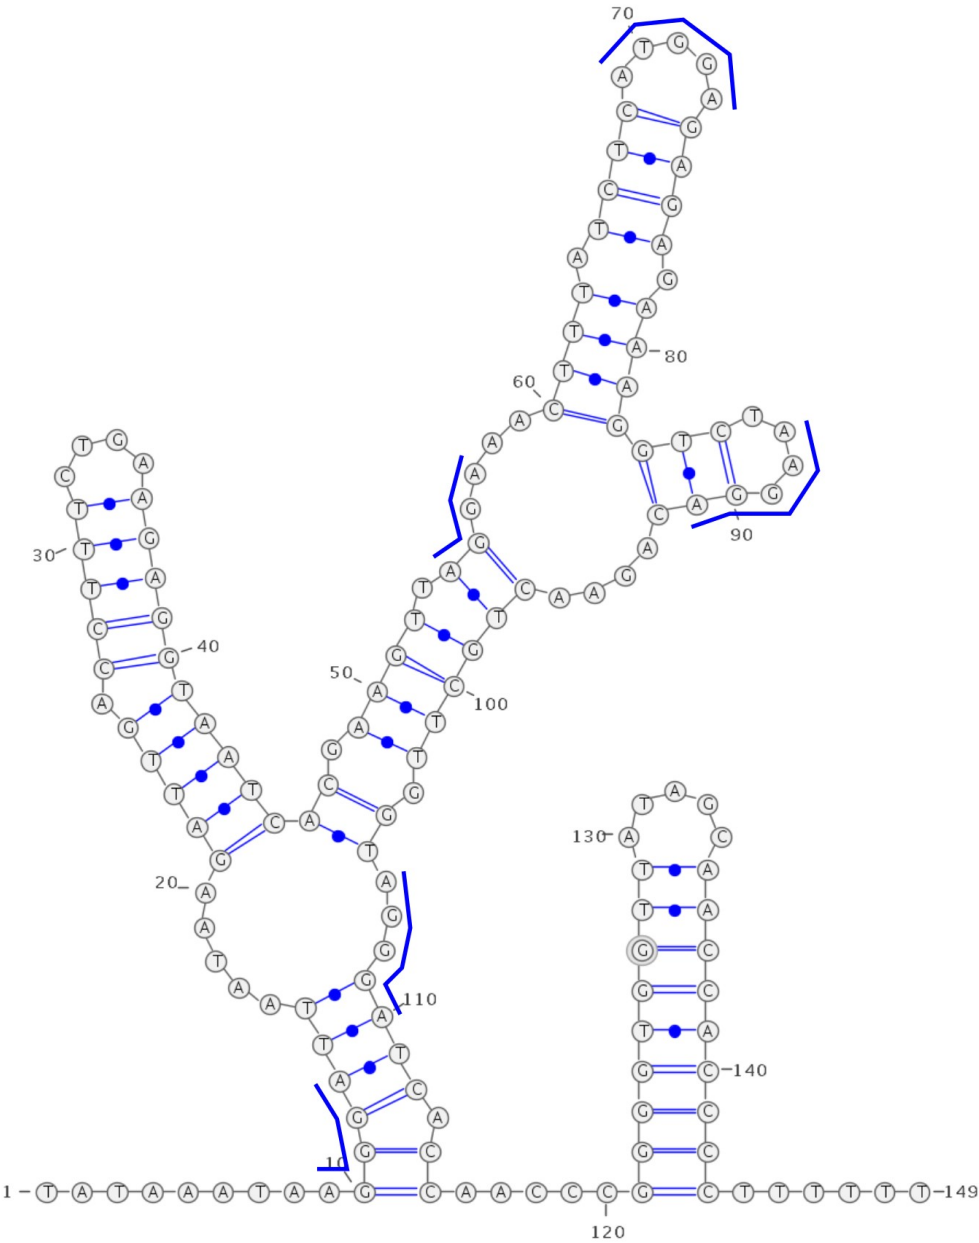

Fig. S10

| Strains                 | Description                                                        | Origin     |
|-------------------------|--------------------------------------------------------------------|------------|
| TOP10F'                 | E. coli Chemically Competent Strain                                | Invitrogen |
| PIR1                    | <i>E. coli</i> Strain with PIR Origin of Replication               | Paul Beare |
| MB-WT                   | <i>C. burnetii</i> “Control” Transposon Mutant ( <i>Tn1832</i> )   | [2]        |
| MB- <i>cbsR12</i>       | <i>C. burnetii</i> Transposon_CbsR12 Mutant Clone ( <i>Tn327</i> ) | [2]        |
| MB- <i>cbsR12</i> -Comp | Pmini-Tn7 Complement of MB- <i>cbsR12</i>                          | This Study |

| Plasmid Name                | Purpose                         | Background | Origin     |
|-----------------------------|---------------------------------|------------|------------|
| Frameshifted Luciferase     | Reporter Assay Negative Control | Top 10 F'  | This Study |
| pBEST + carA 5'UTR          | Reporter Assay                  | Top 10 F'  | This Study |
| pBEST + carA 5'UTR _ CbsR12 | Reporter Assay                  | Top 10 F'  | This Study |
| pBEST + metK                | Reporter Assay                  | Top 10 F'  | This Study |
| pBEST + metK + CbsR12       | Reporter Assay                  | Top 10 F'  | This Study |
| carA_pQE30                  | CarA Expression Plasmid         | Top 10 F'  | This Study |
| metK_pQE30                  | MetK Expression Plasmid         | Top 10 F'  | This Study |
| pQE30_rnc                   | RNase III Assay                 | Top 10 F'  | [1]        |
| csrA1_pQE30                 | CsrA-1 Expression Plasmid       | Top 10 F'  | This Study |
| csrA2_pQE30                 | CsrA-2 Expression plasmid       | Top 10 F'  | This Study |
| pMiniTnS2-ABCD              | Tn327 Complementation           | PIR1       | [3]        |
| pMiniTn7-CbsR12-KAN         | Tn327 Complementation           | PIR1       | This Study |
| pCR2.1-TOPO                 | TA cloning vector               | Top 10     | Invitrogen |

| Primer Category       | Primer Name         | 5'-3' Sequence                                                                        | Reference  |
|-----------------------|---------------------|---------------------------------------------------------------------------------------|------------|
| QRT-PCR               | Q_CbsR12_F_L_qRT    | GCTGATAAACAAGGTAGTTTAGCTGAGGTC                                                        | This Study |
|                       | Q_CbsR12_R_qRT      | GTCTGCAGCGGGCTTCCTT                                                                   | This Study |
|                       | Q_dotA_qRT_F        | CTGGGAGAAGCTAAACAGGGGG                                                                | This Study |
|                       | Q_dotA_qRT_R        | CCACAGCTAGCCCTGAAAAGGTATAC                                                            | This Study |
|                       | Q_cvpD_qRT_F        | CGAGGTTAAAAATGTCTAGATTGCC                                                             | This Study |
|                       | Q_cvpD_qRT_R        | GACTATTAGTTTCAGAACTTCTCTGAAG                                                          | This Study |
|                       | NEW_QCbsR12_F_T7    | TAATACGACTCACTATAGGGGAAACGTGAGTGTTAG                                                  | This Study |
|                       | Q_CbsR12_R_GOOD     | CTCTTTATTAGTACAATCTGGAGGGTCTGCAGC                                                     | This Study |
|                       | QmetK_F+T7          | TAATACGACTCACTATAGGTGAAACATTAATTTAGG                                                  | This Study |
|                       | QmetK_R             | GGTCTTGCCCAATCAGGG                                                                    | This Study |
| EMSA                  | QcarA_F+T7          | TAATACGACTCACTATAGGCTCTAAAGTAACTCAACC                                                 | This Study |
|                       | QcarA_R             | GCGGCAGCACCCCTCTTTACCTA                                                               | This Study |
|                       | QCb1818_F+T7        | TAATACGACTCACTATAGGTTTAAAAATTTTATTAC                                                  | This Study |
|                       | QCb1818_R           | CACGAAGACTATTAGTTTCAGAACTTC                                                           | This Study |
|                       | QpurH_F+T7          | TAATACGACTCACTATAGGAGAGTGGTTATGCGCTAC                                                 | This Study |
|                       | QpurH_R             | GCACGCTTAATCGGCCTTTTCAGTA                                                             | This Study |
|                       | QdnaA_F+T7          | TAATACGACTCACTATAGGAAAACTTTAATTTCTTTTCTTTCCA                                          | This Study |
|                       | QdnaA_R             | GCGGAATTTTCATCGCGCAATAAACC                                                            | This Study |
|                       | QrpsA_F+T7          | TAATACGACTCACTATAGGGAATCGTAAACAGACCCTAACC                                             | This Study |
|                       | QrpsA_R             | GCCTTGACCAAGGCTCCAGGAC                                                                | This Study |
| Reporter Assay        | QCbsR12A_F+T7       | TAATACGACTCACTATAGGCTGGAGGGTCTGCAGCG                                                  | This Study |
|                       | QCbsR12A_R          | GCTGATAAACAAGGTAGTTTAGCTGAGGTC                                                        | This Study |
|                       | LucF_RepAss_carA    | AAGCTTTGTGTGACAATTAATCATCGGCTCGTATAATGTGCGAAATCGAGAAAGACTCTAAAG                       | This Study |
|                       | LucR_RepAssATG_carA | GGATCCCGCGGCAGCACCCCTCTTTACCTAT                                                       | This Study |
|                       | RA_NEWEST_CbsR12_F  | GACTCGAGCTGTTGACAATTAATCATCGGCTCGTATAATGTGTGGAATTGTGAGCGGATAACAATTTCCCTCAATGGGAAACGTG | This Study |
|                       | RA_CbsR12_Rev_G3    | GAAGCGCTAAGTGAGAAAAAAAGGACCGCAAAAGCGG                                                 | This Study |
|                       | RA_LacO_Q5R         | CTCACAATTCACACATTATACGAGCCGATG                                                        | This Study |
|                       | RA_LacO_Q5F         | CGGATAACAATTCGAAATCGAGAAAGACTC                                                        | This Study |
|                       | RA_NEW_MetK_Q5F     | TTTACCTCAGAATCCGAAGACGCCAAAAACATAAAG                                                  | This Study |
|                       | RA_NEW_MetK_Q5R     | TAAGGTCGTGTGCGTCATTTGGATCCTGTTTCC                                                     | This Study |
| XLINK_Seq             | CbsR12_XLINK_1_F    | TAATACGACTCACTATAGGGTTCTTGTGCCACCAAG                                                  | This Study |
|                       | CbsR12_XLINK_1_R    | TCCCTCAATGGGAAACGTGAGTGTTTAG                                                          | This Study |
|                       | CbsR12_XLINK_2_F    | TAATACGACTCACTATAGGGAGGACCGCAAAAGCG                                                   | This Study |
|                       | CbsR12_XLINK_2_R    | GTTTTTGGGCAAGGAAGCCCGCTG                                                              | This Study |
| CarA and MetK Cloning | Q_CarA_Express_F    | CAGGATCCAATCGCTTATCCTTTTGCAAG                                                         | This Study |
|                       | Q_CarA_Express_R    | CAAAGCTTGGTGGAGTCCCTCATTAAATTTAAC                                                     | This Study |
|                       | Q_MetK_Express_F    | CAGGATCCACGCACACGACCTTATTAC                                                           | This Study |
|                       | Q_MetK_Express_R2   | CACTGCAGATTGGTTACGTTTGCGAGC                                                           | This Study |
| CsrA-1/2 Cloning      | Q_CsrA1_pQE_F       | CAGGATCCTTAGTCTTAACACGAACAAATG                                                        | This Study |
|                       | Q_CsrA1_pQE_R       | CAAAGCTTTTCAACTTCCTCAAGAATAGGTG                                                       | This Study |
|                       | Q_CsrA2_pQE_F       | CAGGATCCTTAATACTAACCAGACGTATCGG                                                       | This Study |
|                       | Q_CsrA2_pQE_R       | CAAAGCTTTTCAAATTCGTCAGTCTTCTCAC                                                       | This Study |
| 5' RACE               | CbsR12_GSP2         | CTTCCTTGCCCAAAAACTTCATCC                                                              | This Study |
|                       | carA_GSP1           | CCAAAATCGTAAACGACC                                                                    | This Study |
|                       | carA_GSP2           | CGTTGAAACAGCCTTTGCTAGATCTTTTCCTTTC                                                    | This Study |
|                       | metK_GSP1           | CTTTGCCGGAGAAACAC                                                                     | This Study |
|                       | metK_GSP2           | CGGATTGACAAGGAAACGCGTGTGTTTATC                                                        | This Study |
|                       | cvpD_GSP1           | GAAGGAGAGTGAGCGG                                                                      | This Study |
|                       | cvpD_GSP2           | GCCTACTATTAAGCGTCTCATGATATTCAAGGGC                                                    | This Study |
|                       | IVS_Flank_F         | TAATACGACTCACTATAGGCTGGTTCTCCTCG                                                      | [1]        |
|                       | IVS_Flank_R         | CTTTTCTGGAAGCGTGG                                                                     | [1]        |
|                       | CbsR12 Complement   | GCCCCGAATTCGGCGAAGGCTAAAGTGAGAA                                                       | This Study |
| CbsR12 Complement     | CbsR12_EcoRI_F      | CCTCAGGATCCGTCGGTTTATGCGCGCTTC                                                        | This Study |
|                       | CbsR12_BamHI_R      | CCTATTGCATACACGATTCCACTG                                                              | This Study |
|                       | NM2_GlmS_F          | ATGATTGAACAGATGGATTGCACGC                                                             | This Study |
|                       | NM2_Kan_F           | TATGTTTGTAAAGGGAAGCTGAAGTG                                                            | This Study |
